# Supplementary material for: Role of the tumor suppressor ARF in macrophage polarization: Enhancement of the M2 phenotype in ARF-deficient mice
Source: PubMed Central journal article supplement — Oncoimmunology. 2012 Nov 1;1(8):1227–38. doi: 10.4161/onci.21207 (PMC3518495; doi:10.4161/onci.21207), 2012-11-01
Supplement: onci-1-1227-s01.pdf [file onci-1-1227-s01.pdf]

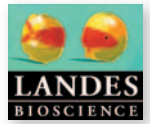

## **Supplemental Material to:**

**Sandra Herranz, Paqui G. Través, Alfonso Luque and  
Sonsoles Hortelano**

**Role of the tumor suppressor ARF in macrophage  
polarization**

**Enhancement of the M2 phenotype in ARF-deficient mice**

**Oncolmunology 2012; 1(9)**

**<http://dx.doi.org/10.4161/onci.21207>**

**[http://www.landesbioscience.com/journals/oncoimmunology/  
article/21207/](http://www.landesbioscience.com/journals/oncoimmunology/article/21207/)**

**Supplementary Table 1.** List of basal expression of inflammatory cytokines and chemokines in ARF-deficient macrophages vs. WT macrophages.

| Position | Refseq    | Symbol   | Description                                                             | Fold Change | p-value  |
|----------|-----------|----------|-------------------------------------------------------------------------|-------------|----------|
| A01      | NM_013854 | Abcf1    | ATP-binding cassette, sub-family F (GCN20), member 1                    | 0,1858      | 0,464561 |
| A02      | NM_009744 | Bcl6     | B-cell leukemia/lymphoma 6                                              | 0,792       | 0,373669 |
| A03      | NM_007551 | Cxcr5    | Chemokine (C-X-C motif) receptor 5                                      | 0,5611      | 0,260341 |
| A04      | NM_009778 | C3       | Complement component 3                                                  | 0,1761      | 0,001488 |
| A05      | NM_009807 | Casp1    | Caspase 1                                                               | 0,7628      | 0,092125 |
| A06      | NM_011329 | Ccl1     | Chemokine (C-C motif) ligand 1                                          | 0,5962      | 0,465197 |
| A07      | NM_011330 | Ccl11    | Chemokine (C-C motif) ligand 11                                         | 0,4031      | 0,37101  |
| A08      | NM_011331 | Ccl12    | Chemokine (C-C motif) ligand 12                                         | 2,7045      | 0,298209 |
| A09      | NM_011332 | Ccl17    | Chemokine (C-C motif) ligand 17                                         | 6,2512      | 0,00196  |
| A10      | NM_011888 | Ccl19    | Chemokine (C-C motif) ligand 19                                         | 1,1174      | 0,984069 |
| A11      | NM_011333 | Ccl2     | Chemokine (C-C motif) ligand 2                                          | 0,331       | 0,005961 |
| A12      | NM_016960 | Ccl20    | Chemokine (C-C motif) ligand 20                                         | 1,155       | 0,928923 |
| B01      | NM_009137 | Ccl22    | Chemokine (C-C motif) ligand 22                                         | 1,1915      | 0,505608 |
| B02      | NM_019577 | Ccl24    | Chemokine (C-C motif) ligand 24                                         | 1,0301      | 0,978354 |
| B03      | NM_009138 | Ccl25    | Chemokine (C-C motif) ligand 25                                         | 0,6498      | 0,794046 |
| B04      | NM_011337 | Ccl3     | Chemokine (C-C motif) ligand 3                                          | 1,223       | 0,288134 |
| B05      | NM_013652 | Ccl4     | Chemokine (C-C motif) ligand 4                                          | 0,9527      | 0,884802 |
| B06      | NM_013653 | Ccl5     | Chemokine (C-C motif) ligand 5                                          | 1,0061      | 0,896538 |
| B07      | NM_009139 | Ccl6     | Chemokine (C-C motif) ligand 6                                          | 1,5934      | 0,136059 |
| B08      | NM_013654 | Ccl7     | Chemokine (C-C motif) ligand 7                                          | 0,2199      | 0,077115 |
| B09      | NM_021443 | Ccl8     | Chemokine (C-C motif) ligand 8                                          | 1,0072      | 0,884113 |
| B10      | NM_011338 | Ccl9     | Chemokine (C-C motif) ligand 9                                          | 1,1113      | 0,224919 |
| B11      | NM_009912 | Ccr1     | Chemokine (C-C motif) receptor 1                                        | 1,5068      | 0,403398 |
| B12      | NM_009915 | Ccr2     | Chemokine (C-C motif) receptor 2                                        | 1,103       | 0,853308 |
| C01      | NM_009914 | Ccr3     | Chemokine (C-C motif) receptor 3                                        | 1,2531      | 0,560283 |
| C02      | NM_009916 | Ccr4     | Chemokine (C-C motif) receptor 4                                        | 0,9815      | 0,942704 |
| C03      | NM_009917 | Ccr5     | Chemokine (C-C motif) receptor 5                                        | 1,313       | 0,432026 |
| C04      | NM_009835 | Ccr6     | Chemokine (C-C motif) receptor 6                                        | 0,5281      | 0,478324 |
| C05      | NM_007719 | Ccr7     | Chemokine (C-C motif) receptor 7                                        | 0,8512      | 0,673759 |
| C06      | NM_007720 | Ccr8     | Chemokine (C-C motif) receptor 8                                        | 1,1148      | 0,616121 |
| C07      | NM_009913 | Ccr9     | Chemokine (C-C motif) receptor 9                                        | 0,8893      | 0,356052 |
| C08      | NM_007768 | Crp      | C-reactive protein, pentraxin-related                                   | 1,5771      | 0,594226 |
| C09      | NM_009142 | Cx3cl1   | Chemokine (C-X3-C motif) ligand 1                                       | 0,2798      | 0,748705 |
| C10      | NM_008176 | Cxcl1    | Chemokine (C-X-C motif) ligand 1                                        | 1,8055      | 0,389719 |
| C11      | NM_021274 | Cxcl10   | Chemokine (C-X-C motif) ligand 10                                       | 0,2134      | 0,008431 |
| C12      | NM_019494 | Cxcl11   | Chemokine (C-X-C motif) ligand 11                                       | 1,0825      | 0,659454 |
| D01      | NM_021704 | Cxcl12   | Chemokine (C-X-C motif) ligand 12                                       | 0,2452      | 0,030727 |
| D02      | NM_018866 | Cxcl13   | Chemokine (C-X-C motif) ligand 13                                       | 0,1254      | 0,030557 |
| D03      | NM_011339 | Cxcl15   | Chemokine (C-X-C motif) ligand 15                                       | 2,8189      | 0,226568 |
| D04      | NM_019932 | Pf4      | Platelet factor 4                                                       | 0,3841      | 0,1401   |
| D05      | NM_009141 | Cxcl5    | Chemokine (C-X-C motif) ligand 5                                        | 0,1642      | 0,022855 |
| D06      | NM_008599 | Cxcl9    | Chemokine (C-X-C motif) ligand 9                                        | 1,2332      | 0,979361 |
| D07      | NM_009910 | Cxcr3    | Chemokine (C-X-C motif) receptor 3                                      | 0,4006      | 0,074498 |
| D08      | NM_007721 | Ccr10    | Chemokine (C-C motif) receptor 10                                       | 0,7163      | 0,894086 |
| D09      | NM_008337 | Ifng     | Interferon gamma                                                        | 1,1246      | 0,614737 |
| D10      | NM_010548 | Il10     | Interleukin 10                                                          | 0,5078      | 0,314497 |
| D11      | NM_008348 | Il10ra   | Interleukin 10 receptor, alpha                                          | 0,9027      | 0,643629 |
| D12      | NM_008349 | Il10rb   | Interleukin 10 receptor, beta                                           | 1,245       | 0,47637  |
| E01      | NM_008350 | Il11     | Interleukin 11                                                          | 0,577       | 0,615798 |
| E02      | NM_008355 | Il13     | Interleukin 13                                                          | 0,5553      | 0,556637 |
| E03      | NM_133990 | Il13ra1  | Interleukin 13 receptor, alpha 1                                        | 1,0957      | 0,794993 |
| E04      | NM_008357 | Il15     | Interleukin 15                                                          | 1,2032      | 0,598827 |
| E05      | NM_010551 | Il16     | Interleukin 16                                                          | 1,0238      | 0,929079 |
| E06      | NM_019508 | Il17b    | Interleukin 17B                                                         | 0,5607      | 0,222955 |
| E07      | NM_008360 | Il18     | Interleukin 18                                                          | 0,8985      | 0,555084 |
| E08      | NM_010554 | Il1a     | Interleukin 1 alpha                                                     | 1,0384      | 0,806144 |
| E09      | NM_008361 | Il1b     | Interleukin 1 beta                                                      | 0,9042      | 0,931759 |
| E10      | NM_019450 | Il1f6    | Interleukin 1 family, member 6                                          | 0,8603      | 0,76576  |
| E11      | NM_027163 | Il1f8    | Interleukin 1 family, member 8                                          | 0,9172      | 0,997097 |
| E12      | NM_008362 | Il1r1    | Interleukin 1 receptor, type I                                          | 0,0485      | 0,368641 |
| F01      | NM_010555 | Il1r2    | Interleukin 1 receptor, type II                                         | 1,4         | 0,54441  |
| F02      | NM_021380 | Il20     | Interleukin 20                                                          | 1,7408      | 0,05204  |
| F03      | NM_008368 | Il2rb    | Interleukin 2 receptor, beta chain                                      | 2,147       | 0,5172   |
| F04      | NM_013563 | Il2rg    | Interleukin 2 receptor, gamma chain                                     | 1,4803      | 0,21646  |
| F05      | NM_010556 | Il3      | Interleukin 3                                                           | 0,6883      | 0,595105 |
| F06      | NM_021283 | Il4      | Interleukin 4                                                           | 1,062       | 0,608801 |
| F07      | NM_008370 | Il5ra    | Interleukin 5 receptor, alpha                                           | 3,404       | 0,267235 |
| F08      | NM_010559 | Il6ra    | Interleukin 6 receptor, alpha                                           | 1,0603      | 0,958963 |
| F09      | NM_010560 | Il6st    | Interleukin 6 signal transducer                                         | 0,7879      | 0,492623 |
| F10      | NM_009909 | Cxcr2    | Chemokine (C-X-C motif) receptor 2                                      | 1,4751      | 0,360873 |
| F11      | NM_008401 | Itgam    | Integrin alpha M                                                        | 1,9935      | 0,395101 |
| F12      | NM_008404 | Itgb2    | Integrin beta 2                                                         | 1,4174      | 0,086891 |
| G01      | NM_010735 | Lta      | Lymphotoxin A                                                           | 1,5062      | 0,549191 |
| G02      | NM_008518 | Ltb      | Lymphotoxin B                                                           | 4,4502      | 0,204118 |
| G03      | NM_010798 | Mif      | Macrophage migration inhibitory factor                                  | 0,8721      | 0,506439 |
| G04      | NM_007926 | Aimp1    | Aminoacyl tRNA synthetase complex-interacting multifunctional protein 1 | 0,9693      | 0,957767 |
| G05      | NM_009263 | Spp1     | Secreted phosphoprotein 1                                               | 0,6048      | 0,069593 |
| G06      | NM_011577 | Tgfb1    | Transforming growth factor, beta 1                                      | 1,0107      | 0,797487 |
| G07      | NM_013693 | Tnf      | Tumor necrosis factor                                                   | 0,9549      | 0,842999 |
| G08      | NM_011609 | Tnfrsf1a | Tumor necrosis factor receptor superfamily, member 1a                   | 1,0065      | 0,89851  |
| G09      | NM_011610 | Tnfrsf1b | Tumor necrosis factor receptor superfamily, member 1b                   | 49,2344     | 0,373874 |
| G10      | NM_011616 | Cd40lg   | CD40 ligand                                                             | 1,0476      | 0,701673 |
| G11      | NM_023764 | Tollip   | Toll interacting protein                                                | 1,1904      | 0,455604 |
| G12      | NM_011798 | Xcr1     | Chemokine (C motif) receptor 1                                          | 2,6956      | 0,270681 |

The p values are calculated based on a Student's t-test of the replicate 2<sup>-</sup>(- Delta Ct) values for each gene in the control group and treatment groups, and p values less than 0.05 are indicated in red.
